# Supplementary material for: Systematic study on preparation of copper nanoparticle embedded porous carbon by carbonization of metal–organic framework for enzymatic glucose sensor
Source: Royal Society of Chemistry journal article supplement (doi:10.1039/c7ra00115k), 2017-01-01
Supplement: c7ra00115k1.pdf [file c7ra00115k1.pdf]

## Electronic Supplementary Information

### **Systematic study on preparation of copper nanoparticle embedded porous carbon by carbonization of metal-organic framework for enzymatic glucose sensor**

Yoodae Song,<sup>a</sup> Damsol Cho,<sup>a,b</sup> Sada Venkateswarlu,<sup>a</sup> and Minyoung Yoon<sup>a\*</sup>

*<sup>a</sup>Department of Nanochemistry, College of Bionano, Gachon University, Sungnam, 13120, Republic of Korea, E-mail:myyoon@gachon.ac.kr*

*<sup>b</sup>Department of Bionanotechnology, College of Bionano, Gachon University, Sungnam, 13120, Republic of Korea*

\*Corresponding author

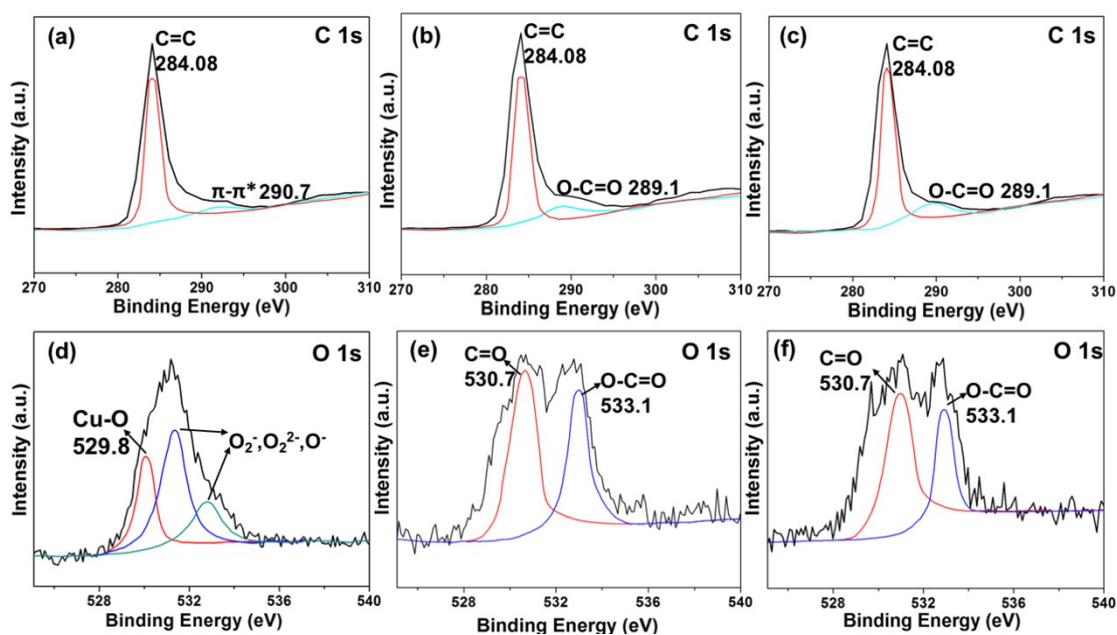

**Fig. S1** High resolution XPS spectra of C 1s for: (a) Cu@C-700, (b) Cu@C-500, and (c) Cu@C-400, and high resolution XPS spectra of O 1s for: (d) Cu@C-700, (e) Cu@C-500, and (f) Cu@C-400.

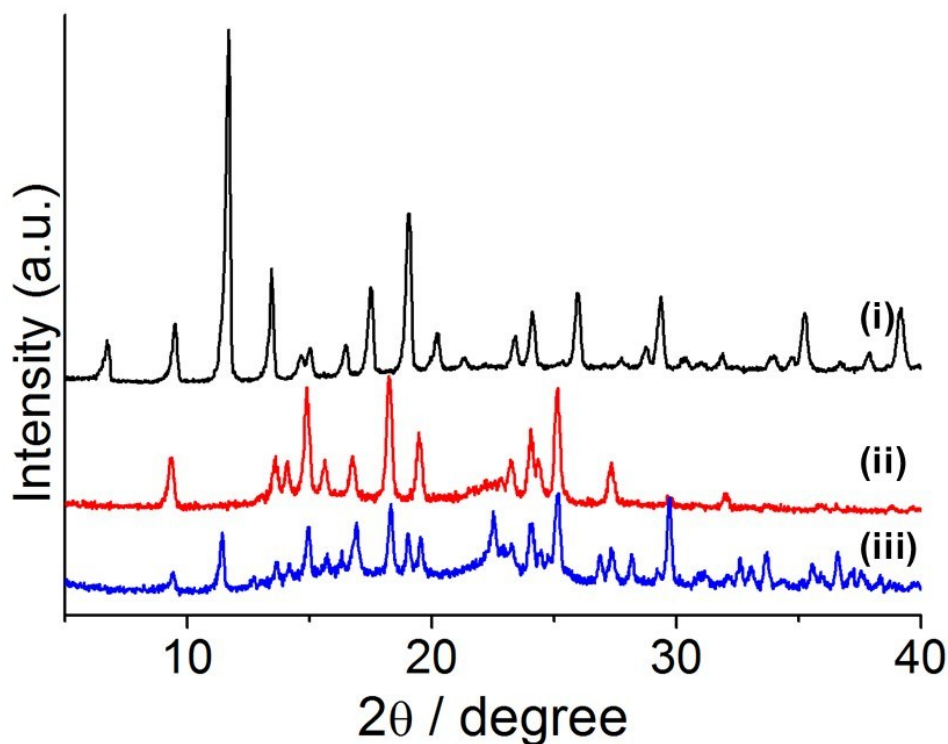

**Fig. S2** PXRD profiles of (i) HKUST-1, (ii) TMB, (iii) HKUST-1 recovered from TMB based  $H_2O_2$  sensing experiment.

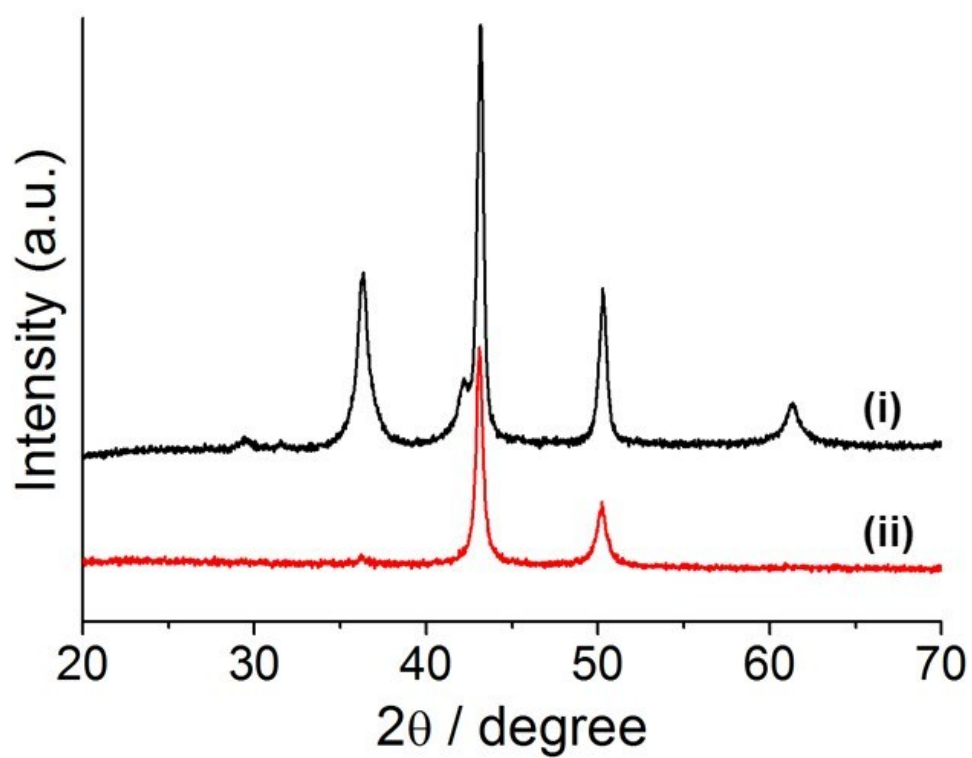

**Fig. S3** PXR profiles of (i) Cu@C-500 recovered from the second cycle of glucose sensing assay, (ii) pristine Cu@C-500.

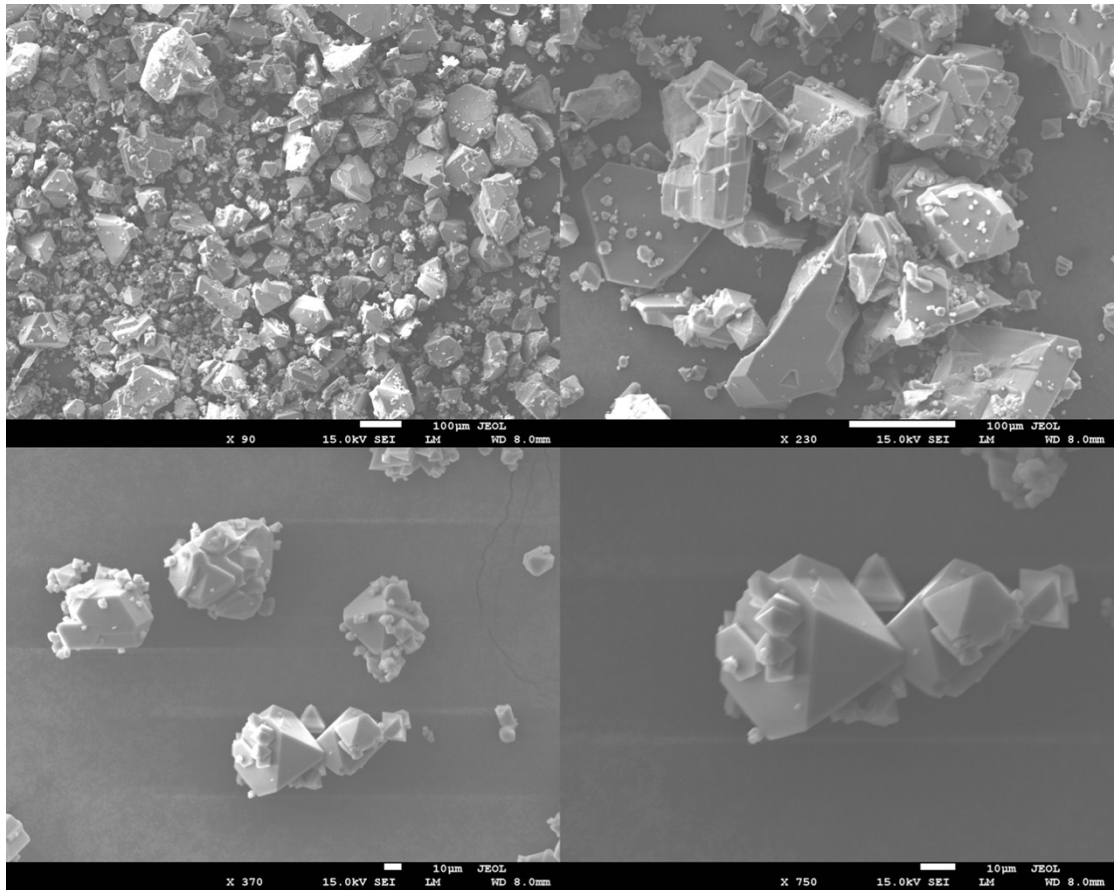

**Fig. S4.** SEM images of pristine HKUST-1
